# Supplementary material
Source: PubMed Central journal article supplement (PMC6716148)
Supplement: NIHMS1047412-supplement-Supplmentary_information.pdf [file NIHMS1047412-supplement-Supplmentary_information.pdf]

## Supplementary Materials for

### **A randomized placebo-controlled pilot trial shows that intranasal vasopressin improves social deficits in children with autism**

Karen J. Parker\*, Ozge Oztan, Robin A. Libove, Noreen Mohsin, Debra S. Karhson, Raena D. Sumiyoshi, Jacqueline E. Summers, Kyle E. Hinman, Kara S. Motonaga, Jennifer M. Phillips, Dean S. Carson, Lawrence K. Fung, Joseph P. Garner, Antonio Y. Hardan

\*Corresponding author. Email: [kjparker@stanford.edu](mailto:kjparker@stanford.edu)

Published 8 May 2019, *Sci. Transl. Med.* **11**, eaau7356 (2019)

DOI: 10.1126/scitranslmed.aau7356

#### **This PDF file includes:**

- Table S1. Raw data and SAS code for the data and analyses shown in Table 1.
- Table S2. Participants' stable concomitant medications during the 4-week AVP treatment trial.
- Table S3. Raw data and SAS code testing whether parents could ascertain treatment condition.
- Table S4. Raw data and SAS code testing whether bottle weights differed between treatment conditions.
- Table S5. Raw data and SAS code for Fig. 2A and associated analyses.
- Table S6. Raw data and SAS code testing treatment effects for the SRS-2 using an unweighted analysis.
- Table S7. Raw data and SAS code testing treatment effects for the SCI subscale of the SRS-2.
- Table S8. Raw data and SAS code correlating parent SRS-2 ratings with clinician CGI evaluations.
- Table S9. Raw data and SAS code for Fig. 2B and associated analyses.
- Table S10. Raw data and SAS code for Fig. 2C and associated analyses.
- Table S11. Raw data and SAS code for Fig. 2D and associated analyses.
- Table S12. Raw data and SAS code for Fig. 2E and associated analyses.
- Table S13. Raw data and SAS code for Fig. 2F and associated analyses.
- Table S14. Raw data and SAS code testing treatment effects for the RRB subscale of the SRS-2.
- Table S15. Change from baseline in the safety assessments for the 4-week AVP treatment trial.
- Table S16. Raw data and SAS code for the data and analyses shown in table S15.

**Table S1. Raw data and SAS code for the data and analyses shown in Table 1.**

```
DATA SI1; INPUT Drug_Status &$16. Sex &$16. EthnicityForAnalysis &$16. Age  
SB5_FSIQ_Standard_Score V1V2_SRS2T_Total_Score V1_CGI_Social_Interaction_and_Co  
V1_AVP_level_pg_mL_ V1_AVPR1a_OXTR; Lines;
```

```
Placebo Male Other 8.525081217 68 80 5 1.037 3.085927963  
Active Male Caucasian 6.343193349 70 81.5 5 0.598 1.885335923  
Placebo Female Caucasian 12.90243101 98 88 4 0.514 4.152868271  
Placebo Male Caucasian 8.327744013 118 90 5 2.085 1.085920333  
Active Male Other 12.99551029 58 71 5 0.869 4.076757431  
Placebo Male Caucasian 11.93878668 74 78.5 5 2.209 2.30529213  
Active Female Caucasian 6.184296978 88 81 5 4.028 0.052930832  
Active Male Caucasian 6.652545079 66 81 5 2.922 2.47912407  
Placebo Male Caucasian 11.69251442 99 90 4 1.811 1.979845047  
Active Male Caucasian 10.86016207 78 66.5 4 1.148 2.046735764  
Placebo Male Caucasian 9.888304858 74 81 5 1.666 5.014736175  
Placebo Male Caucasian 9.258536833 118 81 4 1.323 2.085103989  
Placebo Male Caucasian 10.53974577 114 84.5 5 1.93 2.303398132  
Active Male Other 6.50722277 86 80 4 0.805 5.197927475  
Active Male Caucasian 11.9086728 68 75 5 2.201 1.733133316  
Active Male Other 6.408668236 78 72 4 0.625 2.023418427  
Placebo Male Other 6.099430574 116 82.5 4 0.841 -0.089118958  
Active Female Other 9.272224958 79 90 4 3.718 2.019424438  
Placebo Female Caucasian 12.79304004 114 90 6 0.193 2.61239624  
Active Male Caucasian 12.79030242 122 85.5 6 0.045 3.270860672  
Active Male Caucasian 8.423674992 96 67 5 1.463 3.510000229  
Placebo Male Caucasian 7.134139108 77 76 5 0.733 1.598516464  
Placebo Male Caucasian 8.749452475 54 68.5 5 0.045 1.840114593  
Active Male Other 8.037669733 54 80 6 1.456 2.80421257  
Active Female Other 9.483136225 112 78 4 0.807 1.332126617  
Active Male Other 11.11202365 61 68 5 0.091 1.266662598  
Placebo Male Caucasian 10.30180044 70 89 5 2.274 0.735530853  
Active Male Other 10.19754253 80 85.5 5 0.045 1.592838287  
Active Male Caucasian 6.099430574 58 85.5 5 0.467 1.976573945  
Active Male Other 12.14125693 66 80.5 5 1.217 1.004249573
```

```
;  
RUN;
```

```
PROC GENMOD exactonly DATA=SI1;  
CLASS Drug_Status ;  
MODEL sex = Drug_Status / DIST=Binomial LINK=Logit ALPHA=0.05 type3;  
EXACT Drug_Status;  
RUN;
```

```
PROC GENMOD exactonly DATA=SI1;  
CLASS Drug_Status ;  
MODEL EthnicityForAnalysis = Drug_Status / DIST=Binomial LINK=Logit ALPHA=0.05  
type3;  
EXACT Drug_Status;  
RUN;
```

```
proc glm data=SI1;  
CLASS Drug_Status;  
MODEL Age SB5_FSIQ_Standard_Score V1V2_SRS2T_Total_Score  
V1_CGI_Social_Interaction_and_Co V1_AVP_level_pg_mL_ V1_AVPR1a_OXTR = Drug_Status /  
e3;  
LSmeans Drug_Status / stderr;  
run;
```

**Table S2. Participants' stable concomitant medications during the 4-week AVP treatment trial.**

| Medication           | AVP (N=17) | Placebo (N=13) |
|----------------------|------------|----------------|
| SSRI                 | 1 (6%)     | 2 (15%)        |
| Other antidepressant | 0 (0%)     | 1 (8%)         |
| Antipsychotic        | 0 (0%)     | 1 (8%)         |
| Benzodiazepine       | 0 (0%)     | 1 (8%)         |
| Stimulant            | 2 (12%)    | 2 (15%)        |
| Anti-epileptic       | 0 (0%)     | 1 (8%)         |
| NMDAR antagonist     | 1 (6%)     | 0 (0%)         |
| Guanfacine           | 1 (6%)     | 3 (23%)        |
| Melatonin            | 0 (0%)     | 3 (23%)        |
| Atomoxetine          | 1 (6%)     | 0 (0%)         |

Abbreviations: AVP, arginine vasopressin; SSRI, selective serotonin reuptake inhibitor; NMDAR, N-methyl-D-aspartate receptor. Medication classes are reported as counts and percentages. Fisher's Exact Test was used to test for differences in concomitant medications between the AVP and Placebo treatment groups. No significant differences were discerned.

**Table S3. Raw data and SAS code testing whether parents could ascertain treatment condition.**

| Drug Status Parent Prediction | Actual Drug Status |         |
|-------------------------------|--------------------|---------|
|                               | Active             | Placebo |
| Active                        | 9                  | 7       |
| Placebo                       | 8                  | 6       |

```
DATA SI3; INPUT Drug_Status &$16. Drug_Status_Parent_Prediction &$16.; Lines;
Placebo Placebo
Active Placebo
Placebo Active
Placebo Active
Active Placebo
Placebo Placebo
Active Placebo
Active Active
Placebo Placebo
Active Placebo
Placebo Active
Placebo Placebo
Placebo Placebo
Active Active
Active Active
Active Active
Placebo Active
Active Active
Placebo Active
Active Placebo
Active Placebo
Placebo Active
Placebo Placebo
Active Active
Active Active
Active Active
Placebo Active
Active Active
Active Placebo
Active Placebo
;
RUN;

PROC genmod DATA=SI3 plots= none;
CLASS Drug_Status_Parent_Prediction;
MODEL Drug_Status = Drug_Status_Parent_Prediction/ DIST=Binomial LINK=LOGIT
type3;
lsmeans Drug_Status_Parent_Prediction / ilink;
RUN;
```

**Table S4. Raw data and SAS code testing whether bottle weights differed between treatment conditions.**

```
DATA SI4; INPUT Tx &$16. AvgOfBottle_Weight_mg; Lines;
RCTPBO 57517.2
RCTAVP 70784.1
RCTPBO 69670.7
RCTPBO 59973.05
RCTPBO 59014
RCTAVP 60748.25
RCTAVP 64249.3
RCTPBO 60702
RCTAVP 62387.25
RCTPBO 56917.55
RCTPBO 55630.5
RCTAVP 61070.75
RCTPBO 54861.65
RCTAVP 60157.5
RCTAVP 59819.45
RCTPBO 58171.45
RCTPBO 58288.4
RCTAVP 55150
RCTAVP 53250
RCTPBO 59700
RCTAVP 56150.15
RCTAVP 57083.5
RCTAVP 61477.65
;
RUN;

PROC GLM DATA=SI4;
CLASS Tx;
MODEL AvgOfBottle_Weight_mg = Tx/ e3;
LSMEANS Tx / stderr;
RUN;
```

**Table S5. Raw data and SAS code for Fig. 2A and associated analyses.**

```
DATA SI5; INPUT Drug_Status &$16. Dose_IU_BID EthnicityForAnalysis &$16.
SB5_FSIQ_Standard_Score V1_AVP_level_pg_mL WLS_inv_var_of_v1v2_SRST V1_AVPR1a_OXTR
V1V2_SRS2T_Total_Score V1V2_V6_SRS2T_Total_Score; Lines;
Placebo 0 A 68 1.037 0.012833169 3.085927963 80 18
Active 12 B 70 0.598 0.040816327 1.885335923 81.5 -0.5
Placebo 0 B 98 0.514 0.5 4.152868271 88 19
Placebo 0 B 118 2.085 0.040816327 1.085920333 90 15
Active 16 A 58 0.869 0.012833169 4.076757431 71 -2
Placebo 0 B 74 2.209 0.024691358 2.30529213 78.5 -0.5
Active 12 B 88 4.028 0.055555556 0.052930832 81 5
Active 12 B 66 2.922 2 2.47912407 81 7
Placebo 0 B 99 1.811 0.00617284 1.979845047 90 1
Active 16 B 78 1.148 0.125 2.046735764 66.5 0.5
Placebo 0 B 74 1.666 0.08 5.014736175 81 15
Placebo 0 B 118 1.323 0.00295858 2.085103989 81 -9
Placebo 0 B 114 1.93 0.5 2.303398132 84.5 -0.5
Active 12 A 86 0.805 2 5.197927475 80 24
Active 16 B 68 2.201 0.125 1.733133316 75 24
Active 12 A 78 0.625 0.02 2.023418427 72 -1
Placebo 0 A 116 0.841 0.001953125 -0.089118958 82.5 -0.5
Active 12 A 79 3.718 0.024691358 2.019424438 90 14
Placebo 0 B 114 0.193 0.02 2.61239624 90 24
Active 16 B 122 0.045 0.5 3.270860672 85.5 0.5
Active 12 B 96 1.463 0.055555556 3.510000229 67 5
Placebo 0 B 77 0.733 0.02 1.598516464 76 14
Placebo 0 B 54 0.045 0.5 1.840114593 68.5 3.5
Active 12 A 54 1.456 0.010204082 2.80421257 80 1
Active 12 A 112 0.807 0.125 1.332126617 78 14
Active 16 A 61 0.091 0.012833169 1.266662598 68 7
Placebo 0 B 70 2.274 0.012833169 0.735530853 89 0
Active 16 A 80 0.045 0.002081165 1.592838287 85.5 10.5
Active 12 B 58 0.467 0.5 1.976573945 85.5 -1.5
Active 16 A 66 1.217 0.013888889 1.004249573 80.5 6.5
;
RUN;

PROC GLM DATA=SI5;
WEIGHT WLS_inv_var_of_v1v2_SRST;
CLASS Drug_Status Dose_IU_BID EthnicityForAnalysis;

/* Note that SAS calculates F tests of marginal terms (e.g. main effects contained
in an interaction) incorrectly for weighted least squares, and these marginal terms
should be disregarded in the SAS ANOVA table output. Appropriate tests, equivalent
to those performed by JMP are explicitly specified in the LSMEANS and CONTRAST
statements below. */

MODEL V1V2_V6_SRS2T_Total_Score = Dose_IU_BID(Drug_Status )
Drug_Status
EthnicityForAnalysis
SB5_FSIQ_Standard_Score
V1_AVP_level_pg_mL
Dose_IU_BID*V1_AVP_level_pg_mL(Drug_Status )
Drug_Status*V1_AVP_level_pg_mL
V1_AVPR1a_OXTR
V1V2_SRS2T_Total_Score/ ss3 ;

/* Note that SAS defaults to incorrectly using the simple mean of X variables in
post-hoc tests, rather than the weighted mean of X variables that should follow
```

from the WEIGHT statement. JMP performs post-hoc test correctly. To produce the correct post-hoc tests and thus tests of marginal terms, the correct weighted mean must be explicitly specified. \*/

/\* Here we figure the LSMs for the drug treatment at the correct weighted mean of Baseline AVP \*/

```
lsmeans Drug_Status/ at V1_AVP_level_pg_mL=1.40253 tdiff stderr;
```

/\* This contrast tests for the difference between the drug treatments at the correct weighted mean of Baseline AVP. Note the same p-value to the TDIFF command above, and that the F value is the square of the T value generate by the TDIFF command \*/

```
contrast "Test drug treatment effect at mean baseline AVP = 1.40253"
```

```
Dose_IU_BID(Drug_Status ) 0.5 0.5 -1
```

```
Drug_status 1 -1
```

```
Dose_IU_BID*V1_AVP_level_pg_mL(Drug_Status ) 0.701265 0.701265 -1.40253
```

```
Drug_Status*V1_AVP_level_pg_mL 1.40253 -1.40253;
```

/\* This CONTRAST statement tests the slope of the BaselineAVP\*Drug for the Active drug \*/

```
contrast "Does baseline AVP predict treatment response in AVP treated Sx"
```

```
V1_AVP_level_pg_mL 1 Drug_Status*V1_AVP_level_pg_mL 1 0;
```

```
RUN;
```

**Table S6. Raw data and SAS code testing treatment effects for the SRS-2 using an unweighted analysis.**

```

DATA SI6; INPUT Drug_Status &$16. Dose_IU_BID EthnicityForAnalysis &$16.
SB5_FSIQ_Standard_Score V1_AVP_level_pg_mL WLS_inv_var_of_v1v2_SRST V1_AVPR1a_OXTR
V1V2_SRS2T_Total_Score V1V2_V6_SRS2T_Total_Score; Lines;
Placebo 0 A 68 1.037 0.012833169 3.085927963 80 18
Active 12 B 70 0.598 0.040816327 1.885335923 81.5 -0.5
Placebo 0 B 98 0.514 0.5 4.152868271 88 19
Placebo 0 B 118 2.085 0.040816327 1.085920333 90 15
Active 16 A 58 0.869 0.012833169 4.076757431 71 -2
Placebo 0 B 74 2.209 0.024691358 2.30529213 78.5 -0.5
Active 12 B 88 4.028 0.055555556 0.052930832 81 5
Active 12 B 66 2.922 2 2.47912407 81 7
Placebo 0 B 99 1.811 0.00617284 1.979845047 90 1
Active 16 B 78 1.148 0.125 2.046735764 66.5 0.5
Placebo 0 B 74 1.666 0.08 5.014736175 81 15
Placebo 0 B 118 1.323 0.00295858 2.085103989 81 -9
Placebo 0 B 114 1.93 0.5 2.303398132 84.5 -0.5
Active 12 A 86 0.805 2 5.197927475 80 24
Active 16 B 68 2.201 0.125 1.733133316 75 24
Active 12 A 78 0.625 0.02 2.023418427 72 -1
Placebo 0 A 116 0.841 0.001953125 -0.089118958 82.5 -0.5
Active 12 A 79 3.718 0.024691358 2.019424438 90 14
Placebo 0 B 114 0.193 0.02 2.61239624 90 24
Active 16 B 122 0.045 0.5 3.270860672 85.5 0.5
Active 12 B 96 1.463 0.055555556 3.510000229 67 5
Placebo 0 B 77 0.733 0.02 1.598516464 76 14
Placebo 0 B 54 0.045 0.5 1.840114593 68.5 3.5
Active 12 A 54 1.456 0.010204082 2.80421257 80 1
Active 12 A 112 0.807 0.125 1.332126617 78 14
Active 16 A 61 0.091 0.012833169 1.266662598 68 7
Placebo 0 B 70 2.274 0.012833169 0.735530853 89 0
Active 16 A 80 0.045 0.002081165 1.592838287 85.5 10.5
Active 12 B 58 0.467 0.5 1.976573945 85.5 -1.5
Active 16 A 66 1.217 0.013888889 1.004249573 80.5 6.5
;
RUN;

PROC GLM DATA=SI6;

CLASS Drug_Status Dose_IU_BID EthnicityForAnalysis;

/* Note that SAS calculates F tests of marginal terms (e.g. main effects contained
in an interaction) at the intercept, not at the mean or weighted mean values of
interacting terms. Thus these marginal terms should be disregarded in the SAS ANOVA
table output. */

MODEL V1V2_V6_SRS2T_Total_Score = Dose_IU_BID(Drug_Status )
Drug_Status
EthnicityForAnalysis
SB5_FSIQ_Standard_Score
V1_AVP_level_pg_mL
Dose_IU_BID*V1_AVP_level_pg_mL(Drug_Status )
Drug_Status*V1_AVP_level_pg_mL
V1_AVPR1a_OXTR
V1V2_SRS2T_Total_Score/ ss3 ;
RUN;

```



**Table S7. Raw data and SAS code testing treatment effects for the SCI subscale of the SRS-2.**

```

DATA SI7; INPUT Drug_Status &$16. Dose_IU_BID EthnicityForAnalysis &$16.
SB5_FSIQ_Standard_Score V1_AVP_level_pg_mL WLS_inv_var_of_v1v2_SRST V1_AVPR1a_OXTR
V1V2_SRS2T_SCI V1V2_V6_SRS2T_SCI; Lines;
Placebo 0 Other 68 1.037 0.012833169 3.085927963 79 16
Active 12 Caucasian 70 0.598 0.040816327 1.885335923 80.5 -0.5
Placebo 0 Caucasian 98 0.514 0.5 4.152868271 86 20
Placebo 0 Caucasian 118 2.085 0.040816327 1.085920333 88 15
Active 16 Other 58 0.869 0.012833169 4.076757431 71 0
Placebo 0 Caucasian 74 2.209 0.024691358 2.30529213 75 0
Active 12 Caucasian 88 4.028 0.055555556 0.052930832 80.5 4.5
Active 12 Caucasian 66 2.922 2 2.47912407 80.5 8.5
Placebo 0 Caucasian 99 1.811 0.00617284 1.979845047 89 2
Active 16 Caucasian 78 1.148 0.125 2.046735764 69 2
Placebo 0 Caucasian 74 1.666 0.08 5.014736175 76.5 11.5
Placebo 0 Caucasian 118 1.323 0.00295858 2.085103989 79.5 -10.5
Placebo 0 Caucasian 114 1.93 0.5 2.303398132 85 -1
Active 12 Other 86 0.805 2 5.197927475 77.5 22.5
Active 16 Caucasian 68 2.201 0.125 1.733133316 75 25
Active 12 Other 78 0.625 0.02 2.023418427 69.5 0.5
Placebo 0 Other 116 0.841 0.001953125 -0.089118958 84.5 -1.5
Active 12 Other 79 3.718 0.024691358 2.019424438 89.5 14.5
Placebo 0 Caucasian 114 0.193 0.02 2.61239624 90 23
Active 16 Caucasian 122 0.045 0.5 3.270860672 85.5 0.5
Active 12 Caucasian 96 1.463 0.055555556 3.510000229 64.5 3.5
Placebo 0 Caucasian 77 0.733 0.02 1.598516464 75 15
Placebo 0 Caucasian 54 0.045 0.5 1.840114593 70 4
Active 12 Other 54 1.456 0.010204082 2.80421257 80.5 0.5
Active 12 Other 112 0.807 0.125 1.332126617 79 13
Active 16 Other 61 0.091 0.012833169 1.266662598 69 7
Placebo 0 Caucasian 70 2.274 0.012833169 0.735530853 87 0
Active 16 Other 80 0.045 0.002081165 1.592838287 85 10
Active 12 Caucasian 58 0.467 0.5 1.976573945 84.5 -1.5
Active 16 Other 66 1.217 0.013888889 1.004249573 78 6
;
RUN;

PROC GLM DATA=SI7;
WEIGHT WLS_inv_var_of_v1v2_SRST;
CLASS Drug_Status Dose_IU_BID EthnicityForAnalysis;

/* Note that SAS calculates F tests of marginal terms (e.g. main effects contained
in an interaction) incorrectly for weighted least squares, and these marginal terms
should be disregarded in the SAS ANOVA table output. Appropriate tests, equivalent
to those performed by JMP are explicitly specified in the LSMEANS and CONTRAST
statements below. */

MODEL V1V2_V6_SRS2T_SCI = Dose_IU_BID(Drug_Status )
Drug_Status
EthnicityForAnalysis
SB5_FSIQ_Standard_Score
V1_AVP_level_pg_mL
Dose_IU_BID*V1_AVP_level_pg_mL(Drug_Status )
Drug_Status*V1_AVP_level_pg_mL
V1_AVPR1a_OXTR
V1V2_SRS2T_SCI/ ss3 ;

/* Note that SAS defaults to incorrectly using the simple mean of X variables in
post-hoc tests, rather than the weighted mean of X variables that should follow

```

from the WEIGHT statement. JMP performs post-hoc test correctly. To produce the correct post-hoc tests and thus tests of marginal terms, the correct weighted mean must be explicitly specified. \*/

/\* Here we figure the LSMs for the drug treatment at the correct weighted mean of Baseline AVP \*/

```
lsmeans Drug_Status/ at V1_AVP_level_pg_mL=1.40253 tdiff stderr;
```

/\* This contrast tests for the difference between the drug treatments at the correct weighted mean of Baseline AVP. Note the same p-value to the TDIFF command above, and that the F value is the square of the T value generate by the TDIFF command \*/

```
contrast "Test drug treatment effect at mean baseline AVP = 1.40253"
```

```
Dose_IU_BID(Drug_Status ) 0.5 0.5 -1
```

```
Drug_status 1 -1
```

```
Dose_IU_BID*V1_AVP_level_pg_mL(Drug_Status ) 0.701265 0.701265 -1.40253
```

```
Drug_Status*V1_AVP_level_pg_mL 1.40253 -1.40253;
```

/\* This CONTRAST statement tests the slope of the BaselineAVP\*Drug for the Active drug \*/

```
contrast "Does baseline AVP predict treatment response in AVP treated Sx"
```

```
V1_AVP_level_pg_mL 1 Drug_Status*V1_AVP_level_pg_mL 1 0;
```

```
RUN;
```

**Table S8. Raw data and SAS code correlating parent SRS-2 ratings with clinician CGI evaluations.**

```
DATA SI8; INPUT V6_CGI_Social_Interaction_and_Co V1V2_V6_SRS2T_SCI; Lines;
3 -0.5
4 0
4 4.5
3 8.5
4 2
1 22.5
2 25
4 0.5
2 14.5
4 0.5
4 3.5
4 0.5
3 13
3 7
3 10
4 -1.5
4 6
;
RUN;

proc corr Data=SI8;
VAR V1V2_V6_SRS2T_SCI;
with V6_CGI_Social_Interaction_and_Co;

run;
```

**Table S9. Raw data and SAS code for Fig. 2B and associated analyses.**

```
DATA SI9; INPUT Drug_Status &$16. Dose_IU_BID EthnicityForAnalysis &$16.
SB5_FSIQ_Standard_Score V1_AVP_level_pg_mL WLS_inv_var_of_v1v2_SRST V1_AVPR1a_OXTR
V6_CGI_Social_Interaction_and_C2; Lines;
Placebo 0 Other 68 1.037 0.012833169 3.085927963 4
Active 12 Caucasian 70 0.598 0.040816327 1.885335923 3
Placebo 0 Caucasian 98 0.514 0.5 4.152868271 3
Placebo 0 Caucasian 118 2.085 0.040816327 1.085920333 3
Active 16 Other 58 0.869 0.012833169 4.076757431 4
Placebo 0 Caucasian 74 2.209 0.024691358 2.30529213 4
Active 12 Caucasian 88 4.028 0.055555556 0.052930832 4
Active 12 Caucasian 66 2.922 2 2.47912407 3
Placebo 0 Caucasian 99 1.811 0.00617284 1.979845047 4
Active 16 Caucasian 78 1.148 0.125 2.046735764 4
Placebo 0 Caucasian 74 1.666 0.08 5.014736175 3
Placebo 0 Caucasian 118 1.323 0.00295858 2.085103989 4
Placebo 0 Caucasian 114 1.93 0.5 2.303398132 4
Active 12 Other 86 0.805 2 5.197927475 1
Active 16 Caucasian 68 2.201 0.125 1.733133316 2
Active 12 Other 78 0.625 0.02 2.023418427 4
Placebo 0 Other 116 0.841 0.001953125 -0.089118958 2
Active 12 Other 79 3.718 0.024691358 2.019424438 2
Placebo 0 Caucasian 114 0.193 0.02 2.61239624 2
Active 16 Caucasian 122 0.045 0.5 3.270860672 4
Active 12 Caucasian 96 1.463 0.055555556 3.510000229 4
Placebo 0 Caucasian 77 0.733 0.02 1.598516464 3
Placebo 0 Caucasian 54 0.045 0.5 1.840114593 4
Active 12 Other 54 1.456 0.010204082 2.80421257 4
Active 12 Other 112 0.807 0.125 1.332126617 3
Active 16 Other 61 0.091 0.012833169 1.266662598 3
Placebo 0 Caucasian 70 2.274 0.012833169 0.735530853 3
Active 16 Other 80 0.045 0.002081165 1.592838287 3
Active 12 Caucasian 58 0.467 0.5 1.976573945 4
Active 16 Other 66 1.217 0.013888889 1.004249573 4
;
RUN;

PROC GLM DATA=SI9;
WEIGHT WLS_inv_var_of_v1v2_SRST;
CLASS Drug_Status Dose_IU_BID EthnicityForAnalysis;

/* Note that SAS calculates F tests of marginal terms (e.g. main effects contained
in an interaction) incorrectly for weighted least squares, and these marginal terms
should be disregarded in the SAS ANOVA table output. Appropriate tests, equivalent
to those performed by JMP are explicitly specified in the LSMEANS and CONTRAST
statements below. */

MODEL V6_CGI_Social_Interaction_and_C2 = Dose_IU_BID(Drug_Status )
Drug_Status
EthnicityForAnalysis
SB5_FSIQ_Standard_Score
V1_AVP_level_pg_mL
Dose_IU_BID*V1_AVP_level_pg_mL(Drug_Status )
Drug_Status*V1_AVP_level_pg_mL
V1_AVPR1a_OXTR / ss3 ;

/* Note that SAS defaults to incorrectly using the simple mean of X variables in
post-hoc tests, rather than the weighted mean of X variables that should follow
```

from the WEIGHT statement. JMP performs post-hoc test correctly. To produce the correct post-hoc tests and thus tests of marginal terms, the correct weighted mean must be explicitly specified. \*/

/\* Here we figure the LSMs for the drug treatment at the correct weighted mean of Baseline AVP \*/

```
lsmeans Drug_Status/ at V1_AVP_level_pg_mL=1.40253 tdiff stderr;
```

/\* This contrast tests for the difference between the drug treatments at the correct weighted mean of Baseline AVP. Note the same p-value to the TDIFF command above, and that the F value is the square of the T value generate by the TDIFF command \*/

```
contrast "Test drug treatment effect at mean baseline AVP = 1.40253"
```

```
Dose_IU_BID(Drug_Status ) 0.5 0.5 -1
```

```
Drug_status 1 -1
```

```
Dose_IU_BID*V1_AVP_level_pg_mL(Drug_Status ) 0.701265 0.701265 -1.40253
```

```
Drug_Status*V1_AVP_level_pg_mL 1.40253 -1.40253;
```

/\* This CONTRAST statement tests the slope of the BaselineAVP\*Drug for the Active drug \*/

```
contrast "Does baseline AVP predict treatment response in AVP treated Sx"
```

```
V1_AVP_level_pg_mL 1 Drug_Status*V1_AVP_level_pg_mL 1 0;
```

```
RUN;
```

**Table S10. Raw data and SAS code for Fig. 2C and associated analyses.**

```
DATA SI10; INPUT Drug_Status &$16. Dose_IU_BID EthnicityForAnalysis &$16.  
SB5_FSIQ_Standard_Score V1_AVP_level_pg_mL V1_AVPR1a_OXTR V1_RMET_Total  
V1_V6_RMET_Total; Lines;
```

```
Placebo 0 Other 68 1.037 3.085927963 14 4  
Active 12 Caucasian 70 0.598 1.885335923 . .  
Placebo 0 Caucasian 98 0.514 4.152868271 18 -2  
Placebo 0 Caucasian 118 2.085 1.085920333 9 0  
Active 16 Other 58 0.869 4.076757431 4 -1  
Placebo 0 Caucasian 74 2.209 2.30529213 17 -3  
Active 12 Caucasian 88 4.028 0.052930832 . .  
Active 12 Caucasian 66 2.922 2.47912407 . .  
Placebo 0 Caucasian 99 1.811 1.979845047 22 3  
Active 16 Caucasian 78 1.148 2.046735764 17 1  
Placebo 0 Caucasian 74 1.666 5.014736175 . .  
Placebo 0 Caucasian 118 1.323 2.085103989 13 4  
Placebo 0 Caucasian 114 1.93 2.303398132 19 .  
Active 12 Other 86 0.805 5.197927475 . .  
Active 16 Caucasian 68 2.201 1.733133316 4 -6  
Active 12 Other 78 0.625 2.023418427 . .  
Placebo 0 Other 116 0.841 -0.089118958 9 1  
Active 12 Other 79 3.718 2.019424438 8 0  
Placebo 0 Caucasian 114 0.193 2.61239624 20 -4  
Active 16 Caucasian 122 0.045 3.270860672 17 -2  
Active 12 Caucasian 96 1.463 3.510000229 9 .  
Placebo 0 Caucasian 77 0.733 1.598516464 . .  
Placebo 0 Caucasian 54 0.045 1.840114593 . .  
Active 12 Other 54 1.456 2.80421257 . .  
Active 12 Other 112 0.807 1.332126617 17 -6  
Active 16 Other 61 0.091 1.266662598 7 -1  
Placebo 0 Caucasian 70 2.274 0.735530853 18 4  
Active 16 Other 80 0.045 1.592838287 . .  
Active 12 Caucasian 58 0.467 1.976573945 . .  
Active 16 Other 66 1.217 1.004249573 . .
```

```
;  
RUN;
```

```
PROC GLM DATA=SI10;  
CLASS Drug_Status Dose_IU_BID EthnicityForAnalysis;
```

```
/* Note that SAS calculates F tests of marginal terms (e.g. main effects contained  
in an interaction) at the intercept, not at the mean or weighted mean values of  
interacting terms. Thus these marginal terms should be disregarded in the SAS ANOVA  
table output. */
```

```
MODEL V1V2_V6_SRS2T_Total_Score = Dose_IU_BID(Drug_Status )  
Drug_Status  
EthnicityForAnalysis  
SB5_FSIQ_Standard_Score  
V1_AVP_level_pg_mL  
Dose_IU_BID*V1_AVP_level_pg_mL(Drug_Status )  
Drug_Status*V1_AVP_level_pg_mL  
V1_AVPR1a_OXTR  
V1V2_SRS2T_Total_Score/ ss3 ;
```

```
RUN;
```

```
/* Here we figure the LSMs for the drug treatment at the correct mean of Baseline AVP */
```

```
lsmeans Drug_Status/ tdiff stderr;
```

```
/* This contrast tests for the difference between the drug treatments at the correct mean of Baseline AVP. Note the same p-value to the TDIFF command above, and that the F value is the square of the T value generate by the TDIFF command */
```

```
contrast "Test drug treatment effect at mean baseline AVP = 1.40253"
```

```
Dose_IU_BID(Drug_Status ) 0.5 0.5 -1
```

```
Drug_status 1 -1
```

```
Dose_IU_BID*V1_AVP_level_pg_mL(Drug_Status ) 0.701265 0.701265 -1.40253
```

```
Drug_Status*V1_AVP_level_pg_mL 1.40253 -1.40253;
```

```
RUN;
```

**Table S11. Raw data and SAS code for Fig. 2D and associated analyses.**

```
DATA SI11; INPUT Drug_Status &$16. Dose_IU_BID EthnicityForAnalysis &$16.
SB5_FSIQ_Standard_Score V1_AVP_level_pg_mL V1_Total_Correct_Facial_Emotion
V1_V6_Total_Correct_Facial_Emot V1_AVPR1a_OXTR; Lines;
Placebo 0 Other 68 1.037 26 9 3.085927963
Active 12 Caucasian 70 0.598 . . 1.885335923
Placebo 0 Caucasian 98 0.514 36 -3 4.152868271
Placebo 0 Caucasian 118 2.085 32 20 1.085920333
Active 16 Other 58 0.869 6 -3 4.076757431
Placebo 0 Caucasian 74 2.209 30 -1 2.30529213
Active 12 Caucasian 88 4.028 . . 0.052930832
Active 12 Caucasian 66 2.922 5 . 2.47912407
Placebo 0 Caucasian 99 1.811 37 -1 1.979845047
Active 16 Caucasian 78 1.148 34 -6 2.046735764
Placebo 0 Caucasian 74 1.666 . . 5.014736175
Placebo 0 Caucasian 118 1.323 35 5 2.085103989
Placebo 0 Caucasian 114 1.93 23 . 2.303398132
Active 12 Other 86 0.805 . . 5.197927475
Active 16 Caucasian 68 2.201 19 2 1.733133316
Active 12 Other 78 0.625 . . 2.023418427
Placebo 0 Other 116 0.841 24 16 -0.089118958
Active 12 Other 79 3.718 3 -9 2.019424438
Placebo 0 Caucasian 114 0.193 34 -4 2.61239624
Active 16 Caucasian 122 0.045 28 -9 3.270860672
Active 12 Caucasian 96 1.463 24 . 3.510000229
Placebo 0 Caucasian 77 0.733 5 0 1.598516464
Placebo 0 Caucasian 54 0.045 . . 1.840114593
Active 12 Other 54 1.456 . . 2.80421257
Active 12 Other 112 0.807 38 1 1.332126617
Active 16 Other 61 0.091 6 1 1.266662598
Placebo 0 Caucasian 70 2.274 39 2 0.735530853
Active 16 Other 80 0.045 . . 1.592838287
Active 12 Caucasian 58 0.467 . . 1.976573945
Active 16 Other 66 1.217 . . 1.004249573
;
RUN;

PROC GLM DATA=SI11;
CLASS Drug_Status Dose_IU_BID EthnicityForAnalysis;

/* Note that SAS calculates F tests of marginal terms (e.g. main effects contained
in an interaction) at the intercept, not at the mean or weighted mean values of
interacting terms. Thus these marginal terms should be disregarded in the SAS ANOVA
table output. */

MODEL V1_V6_Total_Correct_Facial_Emot = Dose_IU_BID(Drug_Status )
Drug_Status
EthnicityForAnalysis
SB5_FSIQ_Standard_Score
V1_AVP_level_pg_mL
Dose_IU_BID*V1_AVP_level_pg_mL(Drug_Status )
Drug_Status*V1_AVP_level_pg_mL
V1_AVPR1a_OXTR
V1_Total_Correct_Facial_Emotion / ss3 ;
```



```
/* Here we figure the LSMs for the drug treatment at the correct mean of Baseline
AVP */

lsmeans Drug_Status/ tdiff stderr e;

/* This contrast tests for the difference between the drug treatments at the
correct mean of Baseline AVP. Note the same p-value to the TDIFF command above, and
that the F value is the square of the T value generate by the TDIFF command */

contrast "Test drug treatment effect at mean baseline AVP = 1.28817647"
Dose_IU_BID(Drug_Status ) 0.5 0.5 -1
  Drug_status 1 -1
  Dose_IU_BID*V1_AVP_level_pg_mL(Drug_Status ) 0.64408824 0.64408824 -
1.28817647
  Drug_Status*V1_AVP_level_pg_mL 1.28817647 -1.28817647;
RUN;
```

**Table S12. Raw data and SAS code for Fig. 2E and associated analyses.**

```
DATA SI12; INPUT Drug_Status &$16. Dose_IU_BID EthnicityForAnalysis &$16.
SB5_FSIQ_Standard_Score V1_AVP_level_pg_mL V1_Spence_Anxiety_Total_Raw_Scor
V1_V6_Spence_Anxiety_Total_Raw_S WLS_inv_var_of_v1v2_SRST V1_AVPR1a_OXTR; Lines;
Placebo 0 Other 68 1.037 4 -1 0.012833169 3.085927963
Active 12 Caucasian 70 0.598 16 2 0.040816327 1.885335923
Placebo 0 Caucasian 98 0.514 31 22 0.5 4.152868271
Placebo 0 Caucasian 118 2.085 18 7 0.040816327 1.085920333
Active 16 Other 58 0.869 25 1 0.012833169 4.076757431
Placebo 0 Caucasian 74 2.209 10 2 0.024691358 2.30529213
Active 12 Caucasian 88 4.028 24 0 0.055555556 0.052930832
Active 12 Caucasian 66 2.922 16 6 2 2.47912407
Placebo 0 Caucasian 99 1.811 69 20 0.00617284 1.979845047
Active 16 Caucasian 78 1.148 19 2 0.125 2.046735764
Placebo 0 Caucasian 74 1.666 26 8 0.08 5.014736175
Placebo 0 Caucasian 118 1.323 32 -14 0.00295858 2.085103989
Placebo 0 Caucasian 114 1.93 24 -10 0.5 2.303398132
Active 12 Other 86 0.805 56 47 2 5.197927475
Active 16 Caucasian 68 2.201 11 4 0.125 1.733133316
Active 12 Other 78 0.625 5 -1 0.02 2.023418427
Placebo 0 Other 116 0.841 18 -6 0.001953125 -0.089118958
Active 12 Other 79 3.718 40 20 0.024691358 2.019424438
Placebo 0 Caucasian 114 0.193 25 9 0.02 2.61239624
Active 16 Caucasian 122 0.045 16 -10 0.5 3.270860672
Active 12 Caucasian 96 1.463 6 -1 0.055555556 3.510000229
Placebo 0 Caucasian 77 0.733 12 8 0.02 1.598516464
Placebo 0 Caucasian 54 0.045 7 -2 0.5 1.840114593
Active 12 Other 54 1.456 28 4 0.010204082 2.80421257
Active 12 Other 112 0.807 31 21 0.125 1.332126617
Active 16 Other 61 0.091 6 1 0.012833169 1.266662598
Placebo 0 Caucasian 70 2.274 9 0 0.012833169 0.735530853
Active 16 Other 80 0.045 22 11 0.002081165 1.592838287
Active 12 Caucasian 58 0.467 25 11 0.5 1.976573945
Active 16 Other 66 1.217 9 -1 0.013888889 1.004249573
;
RUN;

PROC GLM DATA=SI12;
WEIGHT WLS_inv_var_of_v1v2_SRST;
CLASS Drug_Status Dose_IU_BID EthnicityForAnalysis;

/* Note that SAS calculates F tests of marginal terms (e.g. main effects contained
in an interaction) incorrectly for weighted least squares, and these marginal terms
should be disregarded in the SAS ANOVA table output. Appropriate tests, equivalent
to those performed by JMP are explicitly specified in the LSMEANS and CONTRAST
statements below. */

MODEL V1_V6_Spence_Anxiety_Total_Raw_S = Dose_IU_BID(Drug_Status )
Drug_Status
EthnicityForAnalysis
SB5_FSIQ_Standard_Score
V1_AVP_level_pg_mL
Dose_IU_BID*V1_AVP_level_pg_mL(Drug_Status )
Drug_Status*V1_AVP_level_pg_mL
V1_AVPR1a_OXTR
V1_Spence_Anxiety_Total_Raw_Scor/ ss3 ;
```

```
/* Note that SAS defaults to incorrectly using the simple mean of X variables in
post-hoc tests, rather than the weighted mean of X variables that should follow
from the WEIGHT statement. JMP performs post-hoc test correctly. To produce the
correct post-hoc tests and thus tests of marginal terms, the correct weighted mean
must be explicitly specified. */
```

```
/* Here we figure the LSMs for the drug treatment at the correct weighted mean of
Baseline AVP */
```

```
lsmeans Drug_Status/ at V1_AVP_level_pg_mL=1.40253 tdiff stderr;
```

```
/* This contrast tests for the difference between the drug treatments at the
correct weighted mean of Baseline AVP. Note the same p-value to the TDIFF command
above, and that the F value is the square of the T value generate by the TDIFF
command */
```

```
contrast "Test drug treatment effect at mean baseline AVP = 1.40253"
```

```
Dose_IU_BID(Drug_Status ) 0.5 0.5 -1
```

```
Drug_status 1 -1
```

```
Dose_IU_BID*V1_AVP_level_pg_mL(Drug_Status ) 0.701265 0.701265 -1.40253
```

```
Drug_Status*V1_AVP_level_pg_mL 1.40253 -1.40253;
```

```
/* This CONTRAST statement tests the slope of the BaselineAVP*Drug for the Active
drug */
```

```
contrast "Does baseline AVP predict treatment response in AVP treated Sx"
```

```
V1_AVP_level_pg_mL 1 Drug_Status*V1_AVP_level_pg_mL 1 0;
```

```
RUN;
```

**Table S13. Raw data and SAS code for Fig. 2F and associated analyses.**

```
DATA SI13; INPUT Drug_Status &$16. Dose_IU_BID EthnicityForAnalysis &$16.
SB5_FSIQ_Standard_Score V1_AVP_level_pg_mL V1_RBSR_Overall_Score
V1_V6_RBSR_Overall_Score WLS_inv_var_of_v1v2_SRST V1_AVPR1a_OXTR; Lines;
Placebo 0 Other 68 1.037 5 -5 0.012833169 3.085927963
Active 12 Caucasian 70 0.598 43 13 0.040816327 1.885335923
Placebo 0 Caucasian 98 0.514 30 18 0.5 4.152868271
Placebo 0 Caucasian 118 2.085 . . 0.040816327 1.085920333
Active 16 Other 58 0.869 10 -8 0.012833169 4.076757431
Placebo 0 Caucasian 74 2.209 20 -1 0.024691358 2.30529213
Active 12 Caucasian 88 4.028 35 26 0.055555556 0.052930832
Active 12 Caucasian 66 2.922 29 9 2 2.47912407
Placebo 0 Caucasian 99 1.811 95 1 0.00617284 1.979845047
Active 16 Caucasian 78 1.148 9 3 0.125 2.046735764
Placebo 0 Caucasian 74 1.666 45 17 0.08 5.014736175
Placebo 0 Caucasian 118 1.323 29 -14 0.00295858 2.085103989
Placebo 0 Caucasian 114 1.93 19 10 0.5 2.303398132
Active 12 Other 86 0.805 41 32 2 5.197927475
Active 16 Caucasian 68 2.201 21 10 0.125 1.733133316
Active 12 Other 78 0.625 18 -2 0.02 2.023418427
Placebo 0 Other 116 0.841 19 15 0.001953125 -0.089118958
Active 12 Other 79 3.718 30 25 0.024691358 2.019424438
Placebo 0 Caucasian 114 0.193 50 23 0.02 2.61239624
Active 16 Caucasian 122 0.045 27 -7 0.5 3.270860672
Active 12 Caucasian 96 1.463 13 5 0.055555556 3.510000229
Placebo 0 Caucasian 77 0.733 26 16 0.02 1.598516464
Placebo 0 Caucasian 54 0.045 14 6 0.5 1.840114593
Active 12 Other 54 1.456 28 7 0.010204082 2.80421257
Active 12 Other 112 0.807 11 11 0.125 1.332126617
Active 16 Other 61 0.091 6 0 0.012833169 1.266662598
Placebo 0 Caucasian 70 2.274 19 1 0.012833169 0.735530853
Active 16 Other 80 0.045 35 -1 0.002081165 1.592838287
Active 12 Caucasian 58 0.467 41 -10 0.5 1.976573945
Active 16 Other 66 1.217 46 16 0.013888889 1.004249573
;
RUN;

PROC GLM DATA=SI13;
WEIGHT WLS_inv_var_of_v1v2_SRST;
CLASS Drug_Status Dose_IU_BID EthnicityForAnalysis;

/* Note that SAS calculates F tests of marginal terms (e.g. main effects contained
in an interaction) incorrectly for weighted least squares, and these marginal terms
should be disregarded in the SAS ANOVA table output. Appropriate tests, equivalent
to those performed by JMP are explicitly specified in the LSMEANS and CONTRAST
statements below. */

MODEL V1_V6_RBSR_Overall_Score = Dose_IU_BID(Drug_Status )
Drug_Status
EthnicityForAnalysis
SB5_FSIQ_Standard_Score
V1_AVP_level_pg_mL
Dose_IU_BID*V1_AVP_level_pg_mL(Drug_Status )
Drug_Status*V1_AVP_level_pg_mL
V1_AVPR1a_OXTR
V1_RBSR_Overall_Score/ ss3 ;
```

```
/* Note that SAS defaults to incorrectly using the simple mean of X variables in
post-hoc tests, rather than the weighted mean of X variables that should follow
from the WEIGHT statement. JMP performs post-hoc test correctly. To produce the
correct post-hoc tests and thus tests of marginal terms, the correct weighted mean
must be explicitly specified. */
```

```
/* Here we figure the LSMs for the drug treatment at the correct weighted mean of
Baseline AVP */
```

```
lsmeans Drug_Status/ at V1_AVP_level_pg_mL=1.40253 tdiff stderr;
```

```
/* This contrast tests for the difference between the drug treatments at the
correct weighted mean of Baseline AVP. Note the same p-value to the TDIFF command
above, and that the F value is the square of the T value generate by the TDIFF
command */
```

```
contrast "Test drug treatment effect at mean baseline AVP = 1.40253"
```

```
Dose_IU_BID(Drug_Status ) 0.5 0.5 -1
```

```
Drug_status 1 -1
```

```
Dose_IU_BID*V1_AVP_level_pg_mL(Drug_Status ) 0.701265 0.701265 -1.40253
```

```
Drug_Status*V1_AVP_level_pg_mL 1.40253 -1.40253;
```

```
/* This CONTRAST statement tests the slope of the BaselineAVP*Drug for the Active
drug */
```

```
contrast "Does baseline AVP predict treatment response in AVP treated Sx"
```

```
V1_AVP_level_pg_mL 1 Drug_Status*V1_AVP_level_pg_mL 1 0;
```

```
RUN;
```

**Table S14. Raw data and SAS code testing treatment effects for the RRB subscale of the SRS-2.**

```

DATA SI14; INPUT Drug_Status &$16. Dose_IU_BID EthnicityForAnalysis &$16.
SB5_FSIQ_Standard_Score V1_AVP_level_pg_mL WLS_inv_var_of_v1v2_SRST V1_AVPR1a_OXTR
V1V2_SRS2T_RRB V1V2_V6_SRS2T_RRB; Lines;
Placebo 0 Other 68 1.037 0.012833169 3.085927963 78 17
Active 12 Caucasian 70 0.598 0.040816327 1.885335923 80 2
Placebo 0 Caucasian 98 0.514 0.5 4.152868271 90 8
Placebo 0 Caucasian 118 2.085 0.040816327 1.085920333 90 10
Active 16 Other 58 0.869 0.012833169 4.076757431 69 -6
Placebo 0 Caucasian 74 2.209 0.024691358 2.30529213 87 -2
Active 12 Caucasian 88 4.028 0.055555556 0.052930832 78 6
Active 12 Caucasian 66 2.922 2 2.47912407 79 4
Placebo 0 Caucasian 99 1.811 0.00617284 1.979845047 90 0
Active 16 Caucasian 78 1.148 0.125 2.046735764 56 -3
Placebo 0 Caucasian 74 1.666 0.08 5.014736175 90 22
Placebo 0 Caucasian 118 1.323 0.00295858 2.085103989 81 -9
Placebo 0 Caucasian 114 1.93 0.5 2.303398132 78 0
Active 12 Other 86 0.805 2 5.197927475 84.5 25.5
Active 16 Caucasian 68 2.201 0.125 1.733133316 72 19
Active 12 Other 78 0.625 0.02 2.023418427 80.5 -2.5
Placebo 0 Other 116 0.841 0.001953125 -0.089118958 68 0
Active 12 Other 79 3.718 0.024691358 2.019424438 90 16
Placebo 0 Caucasian 114 0.193 0.02 2.61239624 86 24
Active 16 Caucasian 122 0.045 0.5 3.270860672 82.5 0.5
Active 12 Caucasian 96 1.463 0.055555556 3.510000229 73.5 7.5
Placebo 0 Caucasian 77 0.733 0.02 1.598516464 78 10
Placebo 0 Caucasian 54 0.045 0.5 1.840114593 62.5 3.5
Active 12 Other 54 1.456 0.010204082 2.80421257 75 2
Active 12 Other 112 0.807 0.125 1.332126617 70 12
Active 16 Other 61 0.091 0.012833169 1.266662598 66 9
Placebo 0 Caucasian 70 2.274 0.012833169 0.735530853 90 0
Active 16 Other 80 0.045 0.002081165 1.592838287 86 13
Active 12 Caucasian 58 0.467 0.5 1.976573945 83.5 -3.5
Active 16 Other 66 1.217 0.013888889 1.004249573 83.5 7.5
;
RUN;

PROC GLM DATA=SI14;
WEIGHT WLS_inv_var_of_v1v2_SRST;
CLASS Drug_Status Dose_IU_BID EthnicityForAnalysis;

/* Note that SAS calculates F tests of marginal terms (e.g. main effects contained
in an interaction) incorrectly for weighted least squares, and these marginal terms
should be disregarded in the SAS ANOVA table output. Appropriate tests, equivalent
to those performed by JMP are explicitly specified in the LSMEANS and CONTRAST
statements below. */

MODEL V1V2_V6_SRS2T_RRB = Dose_IU_BID(Drug_Status )
Drug_Status
EthnicityForAnalysis
SB5_FSIQ_Standard_Score
V1_AVP_level_pg_mL
Dose_IU_BID*V1_AVP_level_pg_mL(Drug_Status )
Drug_Status*V1_AVP_level_pg_mL
V1_AVPR1a_OXTR
V1V2_SRS2T_RRB / ss3 ;

```

```
/* Note that SAS defaults to incorrectly using the simple mean of X variables in
post-hoc tests, rather than the weighted mean of X variables that should follow
from the WEIGHT statement. JMP performs post-hoc test correctly. To produce the
correct post-hoc tests and thus tests of marginal terms, the correct weighted mean
must be explicitly specified. */
```

```
/* Here we figure the LSMs for the drug treatment at the correct weighted mean of
Baseline AVP */
```

```
lsmeans Drug_Status/ at V1_AVP_level_pg_mL=1.40253 tdiff stderr;
```

```
/* This contrast tests for the difference between the drug treatments at the
correct weighted mean of Baseline AVP. Note the same p-value to the TDIFF command
above, and that the F value is the square of the T value generate by the TDIFF
command */
```

```
contrast "Test drug treatment effect at mean baseline AVP = 1.40253"
```

```
Dose_IU_BID(Drug_Status ) 0.5 0.5 -1
```

```
Drug_status 1 -1
```

```
Dose_IU_BID*V1_AVP_level_pg_mL(Drug_Status ) 0.701265 0.701265 -1.40253
```

```
Drug_Status*V1_AVP_level_pg_mL 1.40253 -1.40253;
```

```
/* This CONTRAST statement tests the slope of the BaselineAVP*Drug for the Active
drug */
```

```
contrast "Does baseline AVP predict treatment response in AVP treated Sx"
```

```
V1_AVP_level_pg_mL 1 Drug_Status*V1_AVP_level_pg_mL 1 0;
```

```
RUN;
```

**Table S15. Change from baseline in the safety assessments for the 4-week AVP treatment trial.**

| Measure                                | Drug Treatment<br>main effect       | Change from baseline<br>LSM +/- SE |              |
|----------------------------------------|-------------------------------------|------------------------------------|--------------|
|                                        |                                     | AVP                                | Placebo      |
| <b><u>Vital Sign</u></b>               |                                     |                                    |              |
| BP, Systolic, Sitting (mmHg)           | F <sub>1,28</sub> =2.9584; P=0.0966 | 5.5 ± 2.53                         | -1.1 ± 2.89  |
| BP, Diastolic, Sitting (mmHg)          | F <sub>1,28</sub> =2.5600; P=0.1200 | 3.2 ± 2.09                         | -1.8 ± 2.39  |
| BP, Systolic, Standing (mmHg)          | F <sub>1,28</sub> =0.3844; P=0.5397 | 1.9 ± 2.38                         | -0.3 ± 2.73  |
| BP, Diastolic, Standing (mmHg)         | F <sub>1,28</sub> =0.0289; P=0.8700 | 0.1 ± 2.31                         | -0.5 ± 2.64  |
| BP Change Systolic (Standing-Sitting)  | F <sub>1,28</sub> =1.0816; P=0.3069 | -3.6 ± 2.76                        | 0.8 ± 3.15   |
| BP Change Diastolic (Standing-Sitting) | F <sub>1,28</sub> =1.2544; P=0.2726 | -3.1 ± 2.65                        | 1.4 ± 3.03   |
| Pulse sitting (beats per minute)       | F <sub>1,28</sub> =0.8836; P=0.3563 | 1.9 ± 3.87                         | 7.5 ± 4.43   |
| Pulse standing (beats per minute)      | F <sub>1,28</sub> =0.9604; P=0.3359 | 4.0 ± 3.57                         | 9.3 ± 4.08   |
| Pulse change (beats per minute)        | F <sub>1,28</sub> =0.0025; P=0.9598 | 2.1 ± 2.75                         | 1.8 ± 3.15   |
| Temperature (°F)                       | F <sub>1,28</sub> =2.3409; P=0.1369 | 0.2 ± 0.17                         | -0.2 ± 0.19  |
| <b><u>Electrocardiogram</u></b>        |                                     |                                    |              |
| Heart Rate (bpm)                       | F <sub>1,26</sub> =0.4096; P=0.5272 | -2.5 ± 3.75                        | 1.2 ± 4.32   |
| P Duration (ms)                        | F <sub>1,25</sub> =0.2025; P=0.6600 | -2.6 ± 5.76                        | 1.5 ± 6.95   |
| PR Interval (ms)                       | F <sub>1,26</sub> =0.3481; P=0.5586 | -4.6 ± 6.40                        | 1.2 ± 7.39   |
| QRS Interval (ms)                      | F <sub>1,26</sub> =0.3844; P=0.5421 | 0.4 ± 1.55                         | 1.8 ± 1.78   |
| QT Interval (ms)                       | F <sub>1,26</sub> =0.9604; P=0.3378 | 3.5 ± 5.53                         | -4.8 ± 6.39  |
| Bazett's Corrected QT Interval (ms)    | F <sub>1,26</sub> <0.0001; P=0.9979 | -1.9 ± 5.07                        | -1.9 ± 5.86  |
| <b><u>Clinical Chemistry</u></b>       |                                     |                                    |              |
| Sodium (mmol/L)                        | F <sub>1,28</sub> =0.0081; P=0.9328 | 0.24 ± 0.63                        | 0.15 ± 0.72  |
| Potassium (mmol/L)                     | F <sub>1,28</sub> =0.2601; P=0.6132 | 0.15 ± 0.11                        | 0.06 ± 0.13  |
| Chloride (mmol/L)                      | F <sub>1,28</sub> =2.3716; P=0.1348 | 1.0 ± 0.56                         | -0.31 ± 0.64 |
| CO <sub>2</sub> (mmol/L)               | F <sub>1,28</sub> =1.4400; P=0.2395 | -0.12 ± 0.57                       | 0.92 ± 0.65  |
| Anion Gap (mmol/L)                     | F <sub>1,28</sub> =0.0256; P=0.8762 | -0.65 ± 0.78                       | -0.46 ± 0.89 |
| Glucose (mg/dL)                        | F <sub>1,28</sub> =0.2704; P=0.6099 | 2.2 ± 4.41                         | 5.7 ± 5.04   |
| Creatinine (mg/dL)                     | F <sub>1,28</sub> =1.2321; P=0.2756 | -0.017 ± 0.03                      | 0.027 ± 0.03 |
| Urea Nitrogen (mg/dL)                  | F <sub>1,28</sub> =2.4025; P=0.1314 | -1.3 ± 0.78                        | 0.54 ± 0.89  |
| Calcium (mg/dL)                        | F <sub>1,28</sub> =2.3716; P=0.1355 | 0.047 ± 0.07                       | 0.20 ± 0.07  |
| Osmolality (Serum) (mOsm/kg)           | F <sub>1,28</sub> =2.6244; P=0.1158 | 0.18 ± 1.01                        | -2.3 ± 1.15  |
| Osmolality (Urine) (mOsm/kg)           | F <sub>1,25</sub> =0.0625; P=0.8027 | 8.5 ± 82.6                         | -23 ± 92.3   |
| <b><u>Physiological</u></b>            |                                     |                                    |              |
| Height (centimeters)                   | F <sub>1,28</sub> =2.0736; P=0.1619 | 0.8 ± 0.23                         | 0.3 ± 0.27   |
| Weight (kilograms)                     | F <sub>1,28</sub> =0.0225; P=0.8809 | 0.3 ± 0.30                         | 0.2 ± 0.34   |

Abbreviations: LSM, Least Squares Mean; AVP, arginine vasopressin; BP, blood pressure. Within-subject changes from baseline were calculated for each measure, and the effect of treatment tested using a general linear model. No significant effects were discerned.



**Table S16. Raw data and SAS code for the data and analyses shown in table S15.**

```
DATA Safety_vitals; INPUT Drug_Status &$ V6_V1_BP_Sys_Sit V6_V1_BP_Dias_Sit
V6_V1_Pulse_bmp_Sit V6_V1_BP_Sys_Stand V6_V1_BP_Dias_Stand V6_V1_Pulse_bmp_Stand
V6_V1_BP_Sys_Delta V6_V1_BP_Dias_Delta V6_V1_Pulse_bmp_Delta V6_V1_Temperature_F
V6_V1_Height_cm V6_V1_Weight_kg; Lines;
Active -3 -16 3 -7 -14 1 -4 2 -2 -1.3 0.5 0.79
Active 12 10 8 6 1 -6 -6 -9 -14 0.2 0 0.91
Active 8 4 2 -3 -2 26 -11 -6 24 0.8 0.25 0
Active 19 18 6 21 20 -1 2 2 -7 -0.1 0.25 0
Active 8 4 2 3 8 11 -5 4 9 -0.3 2.5 -0.23
Active -12 -5 -18 -2 0 5 10 5 23 0 1.25 0.68
Active 20 11 -10 6 2 10 -14 -9 20 -0.4 2.5 0.45
Active -3 8 8 -2 0 9 1 -8 1 0.8 0 -0.23
Active 11 -1 -9 16 2 10 5 3 19 0.7 1.5 0.9
Active -5 7 -5 9 14 -16 14 7 -11 0.2 1 2.05
Active 5 5 8 11 -9 7 6 -14 -1 -0.2 1.22 -0.85
Active -5 12 6 3 -19 -7 8 -31 -13 -0.1 -1.5 -4
Active -13 -9 -16 -9 -5 -14 4 4 2 -0.2 0.2 0.15
Active 15 -8 -13 -14 15 -23 -29 23 -10 0.4 1.5 -0.3
Active 2 -6 30 5 -2 18 3 4 -12 0.5 0.7 0.35
Active 27 17 13 0 -5 14 -27 -22 1 1 1.2 1
Active 8 4 18 -10 -4 24 -18 -8 6 1.2 0.6 3.15
Placebo 3 6 17 1 4 8 -2 -2 -9 1.8 1 -0.23
Placebo 4 5 24 -3 7 14 -7 2 -10 0.5 -0.5 -1.81
Placebo 4 -1 -35 -4 0 -25 -8 1 10 -1 1 0
Placebo -7 -5 36 -11 3 45 -4 8 9 -0.3 0.25 0
Placebo -3 -4 -21 -3 2 0 0 6 21 0.3 0 1.13
Placebo -7 -8 0 7 -7 4 14 1 4 -1.2 1.25 0.23
Placebo -15 -18 22 -11 1 20 4 19 -2 -0.5 0 -0.45
Placebo -6 0 26 -5 -1 23 1 -1 -3 0.1 1.5 1.82
Placebo -8 -2 0 -9 -6 0 -1 -4 0 -0.2 2 0
Placebo 19 5 3 1 -6 8 -18 -11 5 -0.1 -1 0.95
Placebo 0 -4 7 6 1 12 6 5 5 -1.1 -0.9 0.7
Placebo 10 9 16 29 17 8 19 8 -8 -0.7 -0.3 0.3
Placebo -8 -7 2 -2 -21 4 6 -14 2 -0.3 -0.5 0.15
;
RUN;

PROC GLM DATA=Safety_vitals ALPHA=0.05 PLOTS=NONE;
CLASS Drug_Status;
MODEL V6_V1_BP_Sys_Sit V6_V1_BP_Dias_Sit V6_V1_Pulse_bmp_Sit V6_V1_BP_Sys_Stand
V6_V1_BP_Dias_Stand V6_V1_Pulse_bmp_Stand V6_V1_BP_Sys_Delta V6_V1_BP_Dias_Delta
V6_V1_Pulse_bmp_Delta V6_V1_Temperature_F V6_V1_Height_cm V6_V1_Weight_kg
= Drug_Status / SS3;
lsmeans DRUG_STATUS / STDERR;
RUN;

DATA Safety_clinical_labs; INPUT Drug_Status &$ V6_V1_Sodium_mmol_L
V6_V1_Potassium_mmol_L V6_V1_Chloride_mmol_L V6_V1_CO2_mmol_L
V6_V1_Anion_Gap_mmol_L V6_V1_Glucose_mg_dL V6_V1_Creatinine_mg_dL
V6_V1_Urea_Nitrogen_mg_dL V6_V1_Calcium_mg_dL V6_V1_Osmolality_Serum_mOsm_kg
V6_V1_Osmolality_Urine_mOsm_kg; Lines;
Active 2 -0.1 2 -1 1 21 0 -1 0.1 -3 7
Active -1 0.4 3 1 -5 12 0 -7 -0.3 -3 -63
Active -1 1.1 3 2 -6 -59 -0.1 4 0.1 1 .
Active 3 0.4 3 -1 1 -7 0.1 -2 0.1 5 362
Active 1 -0.2 0 -1 2 -22 0 -6 0.2 -3 -211
Active -2 0.1 0 2 -4 10 0 -3 -0.1 -4 197
```

```

Active -7 -0.3 -4 -1 -2 8 0 -1 -0.2 -3 84
Active 0 0.2 0 -1 1 -4 -0.1 -1 0.6 0 422
Active 5 1.2 5 1 -1 27 0 -3 0.3 1 .
Active 0 0 -1 -1 2 -5 -0.1 0 0.3 -1 -259
Active 6 0 4 2 0 10 -0.03 1 0 1 223
Active 1 0.2 2 0 -1 3 0 1 0.1 2 105
Active 0 -0.1 1 1 -2 -5 0.05 4 -0.2 7 319
Active -1 -0.3 -2 -3 4 8 0.03 -1 0.1 0 -691
Active 1 -0.4 2 -3 2 21 0.06 -3 -0.1 -2 75
Active -3 0.5 -2 -1 0 17 -0.05 1 0 9 224
Active 0 -0.2 1 2 -3 3 -0.15 -5 -0.2 -4 -667
Placebo -2 1.1 0 -2 0 13 -0.1 -5 0.8 -5 -175
Placebo -1 0.5 -3 1 1 15 -0.1 0 -0.1 0 -391
Placebo 0 -0.6 1 2 -3 -5 0.2 -3 0.3 -12 -472
Placebo 2 0 -5 8 -1 38 0.1 5 0.2 -1 112
Placebo 4 0.4 2 -2 4 5 0 0 0.3 1 401
Placebo 2 0 3 5 -6 -11 0.1 1 0 -6 32
Placebo 2 0.2 -2 -2 6 -6 -0.1 -4 0.1 -7 -416
Placebo 1 -0.2 1 0 0 5 0.2 3 0.5 -2 .
Placebo -2 0.2 1 1 -4 12 -0.1 7 -0.1 3 73
Placebo -1 0.1 -1 2 -2 -22 0.3 0 0.2 2 49
Placebo 0 -0.4 0 1 -1 17 0.04 0 0.2 -2 -63
Placebo 0 -0.1 -2 -3 5 17 -0.18 1 0.6 -5 178
Placebo -3 -0.4 1 1 -5 -4 -0.01 2 -0.4 4 398

```

;

**RUN;**

**PROC GLM** DATA=Safety\_clinical\_labs ALPHA=0.05 plots=none;

**CLASS** Drug\_Status;

**MODEL** V6\_V1\_Sodium\_mmol\_L V6\_V1\_Potassium\_mmol\_L V6\_V1\_Chloride\_mmol\_L  
V6\_V1\_CO2\_mmol\_L V6\_V1\_Anion\_Gap\_mmol\_L V6\_V1\_Glucose\_mg\_dL V6\_V1\_Creatinine\_mg\_dL  
V6\_V1\_Urea\_Nitrogen\_mg\_dL V6\_V1\_Calcium\_mg\_dL V6\_V1\_Osmolality\_Serum\_mOsm\_kg  
V6\_V1\_Osmolality\_Urine\_mOsm\_kg  
= Drug\_Status/ **ss3**;

**lsmeans** DRUG\_STATUS / **STDERR**;

**RUN;**

**DATA** Safety\_ECG; **INPUT** Drug\_Status &\$16. V6\_V1\_Heart\_Rate\_bpm\_  
V6\_V1\_P\_Duration\_ms\_ V6\_V1\_PR\_Interval\_ms\_ V6\_V1\_QRS\_Interval\_ms\_  
V6\_V1\_QT\_Interval\_ms\_ V6\_V1\_QTCb\_Interval\_ms\_; **Lines**;

```

Active -4 -4 3 -5 11 6
Active -18 5 17 -1 5 -38
Active -10 4 -5 15 7 -12
Active 6 -70 -86 -6 5 19
Active . . . . .
Active -21 22 5 3 46 3
Active -8 6 4 4 11 -3
Active -9 -1 -1 -3 8 -10
Active 0 7 -1 -5 -15 -19
Active -10 -15 -13 6 2 -26
Active 12 2 1 2 -9 12
Active 4 0 1 5 1 12
Active -14 1 -7 -14 23 -4
Active 15 12 9 -2 -17 7
Active 11 6 7 5 4 33
Active -11 2 1 6 17 0
Active 17 -18 -9 -4 -43 -11
Placebo -12 . -34 5 -13 -43
Placebo 12 -21 -19 6 -12 23
Placebo 23 -21 -1 6 -35 7
Placebo 30 -13 -9 -4 -50 19

```

```
Placebo . . . . .
Placebo -19 8 0 11 7 -41
Placebo 5 -8 -2 8 -12 -1
Placebo 9 -7 -5 -4 -3 14
Placebo 6 -12 -11 -2 13 29
Placebo 5 75 86 -5 -3 9
Placebo 0 4 5 -1 -12 -15
Placebo -37 11 5 0 52 -14
Placebo -8 0 -1 2 11 -10
```

```
;  
RUN;
```

```
PROC GLM DATA=Safety_ECG ALPHA=0.05 plots=none;  
CLASS Drug_Status;  
MODEL V6_V1_Heart_Rate_bpm_ V6_V1__P_Duration_ms_ V6_V1_PR_Interval_ms_  
V6_V1_QRS_Interval_ms_ V6_V1_QT_Interval_ms_ V6_V1_QTCb_Interval_ms_ =  
Drug_Status/ ss3;  
lsmeans DRUG_STATUS / STDERR;  
RUN;
```
